# Supplementary material for: Effect of tobacco and nicotine in causing staining of dental hard tissues and dental materials: A systematic review and meta‐analysis
Source: PubMed Central journal article supplement (PMC9932248; doi:10.1002/cre2.683), 2022-11-13
Supplement: CRE2-9-150-s007.pdf [file CRE2-9-150-s007.pdf]

|                                                                           |                                                                                                                                                                                                    |
|---------------------------------------------------------------------------|----------------------------------------------------------------------------------------------------------------------------------------------------------------------------------------------------|
| Title:                                                                    |                                                                                                                                                                                                    |
| Author:                                                                   |                                                                                                                                                                                                    |
| Year:                                                                     |                                                                                                                                                                                                    |
| Journal:                                                                  |                                                                                                                                                                                                    |
| Abstract and full text language :                                         |                                                                                                                                                                                                    |
| Location of first author:                                                 |                                                                                                                                                                                                    |
| Funding:                                                                  |                                                                                                                                                                                                    |
| Type of study:                                                            | <p>RCT</p> <p>Non-randomised clinical study<br/>(cohort studies, case-control studies, cross-sectional studies)</p> <p>Clinical survey/ epidemiological study</p> <p>In vitro laboratory study</p> |
| Form of tobacco/nicotine:                                                 |                                                                                                                                                                                                    |
| Substrate studied:                                                        | <p>Tooth</p> <p>Enamel</p> <p>Dentine</p> <p>Resin composite</p> <p>Porcelain</p> <p>Silicone</p> <p>Acrylic</p> <p>Other:</p>                                                                     |
| Suitable control with no smoke exposure                                   | Yes/No                                                                                                                                                                                             |
| Does the study investigate the effect of tobacco/smoke on discoloration?  | <p>Yes/No</p> <p>If so, what are the results?</p>                                                                                                                                                  |
| Does the study look at specific components of tobacco/smoke?              | <p>Yes/No</p> <p>If so, what are the results?</p>                                                                                                                                                  |
| Does the study investigate the effect of nicotine alone on discoloration? | Yes/No                                                                                                                                                                                             |
| Does the study compare different tobacco and nicotine products?           | <p>Yes/No</p> <p>If so, what are the results?</p>                                                                                                                                                  |
| Include/exclude                                                           | If excluded, reasons:                                                                                                                                                                              |

Supplemental table 3: Data collection sheet template
